# Supplementary material for: Molecular Imaging of Human Skeletal Myoblasts (huSKM) in Mouse Post-Infarction Myocardium
Source: MDPI journal article supplement (doi:10.3390/ijms221910885), 2021-10-08

Supplementary file

Molecular imaging of human skeletal myoblasts (huSkM) in mouse post-infarction myocardium.

Katarzyna Fiedorowicz , Weronika Wargocka-Matuszewska , Karolina A. Ambożkiewicz, Anna Rugowska,  
Łukasz Cheda, Michał Fiedorowicz, Agnieszka Zimna , Monika Drabik, Szymon Borkowski , Maciej  
Świątkiewicz, Piotr Bogorodzki , Paweł Grieb , Paulina Hamankiewicz , Tomasz Kolanowski , Natalia  
Rozwadowska, Urszula Kozłowska, Aleksandra Klimczak, Jerzy Kolasiński, Zbigniew Rogulski, Maciej Kurpisz

Corresponding author

Maciej Kurpisz MD, PhD

Institute of Human Genetics, Polish Academy of Sciences

Strzeszyńska 32, 60-479 Poznań, Poland

E-mail: [maciej.kurpisz@igcz.poznan.pl](mailto:maciej.kurpisz@igcz.poznan.pl)

**Supplementary Figure S1** Flow cytometry phenotype characteristics of mesenchymal stem cells. Cells were positive for CD73 (a), CD90 (b) and CD 34 (c) markers and (d) negative for CD45 (haematopoietic marker).

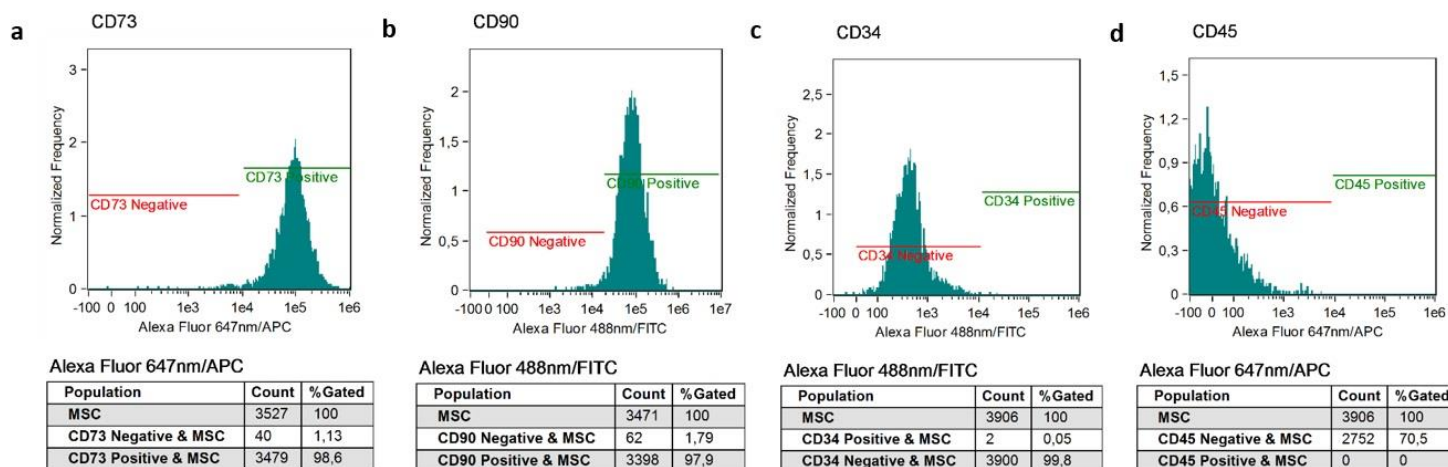

**Supplementary Table S1.** Comparison of the colonization percentage in the heart by using [99mTc]Tc-HMPAO -labelled stem cells. Results were obtained by comparing the ratio of the calculated SUVs from the first (0 min) and the second (23 +/- 1 h) SPECT/CT measurements, taking into account the half-life of [99mTc]Tc-HMPAO. The results are presented for each variant of the cells applied as the mean  $\pm$  SD. The post-infarction group of mice was compared with the control group (healthy hearts: huSkM n=7, MSC n=8, huSkM+MSC n=4, huSkMCx43+MSC n=4; post-infarction hearts huSkM n=8, MSC n=3, huSkM+MSC n=8, huSkMCx43+MSC n=8. Data are presented as the mean  $\pm$  SD, Mann-Whitney U test).

| The percentage of colonization of [ <sup>99m</sup> Tc]Tc-HMPAO-labeled stem cells in the heart after 24h. |                  |                   |                   |                   |                  |                   |                  |
|-----------------------------------------------------------------------------------------------------------|------------------|-------------------|-------------------|-------------------|------------------|-------------------|------------------|
| huSkM                                                                                                     |                  | MSC               |                   | huSkM+MSC         |                  | huSkMCx43+MSC     |                  |
| control                                                                                                   | post-infarction  | control           | post-infarction   | control           | post-infarction  | control           | post-infarction  |
| 47,23 $\pm$ 5,14                                                                                          | 29,98 $\pm$ 8,22 | 19,24 $\pm$ 11,77 | 42,20 $\pm$ 15,98 | 39,29 $\pm$ 10,56 | 19,76 $\pm$ 8,40 | 23,03 $\pm$ 11,35 | 67,17 $\pm$ 9,30 |

**Abbreviations:** huSkM- human skeletal myoblasts, MSC- mesenchymal stem cells, huSkM+MSC- human skeletal myoblasts in combination with mesenchymal stem cells, huSkMCx43 + MSC- human skeletal myoblasts overexpressing Cx43 in combination with mesenchymal stem cells, SUV- standardized uptake value, SPECT/CT- single photon emission computed tomography/computed tomography, [99mTc]Tc-HMPAO- Technetium-99m Hexamethylpropyleneamine Oxime

**Supplementary Table S2** List of antibodies used for immunofluorescence and flow cytometry.

| Antibodies immunofluorescence | Manufacturer               | Characteristics                           |
|-------------------------------|----------------------------|-------------------------------------------|
| mouse anti-desmin             | Abcam<br>Cambridge<br>(UK) | Myogenic cells markers                    |
| mouse anti-heavy chain myosin |                            |                                           |
| mouse anti-CD 45              | Abcam<br>Cambridge<br>(UK) | hematopoietic marker                      |
| rabbit anti-CD 73             |                            | mesenchymal cell markers                  |
| rabbit anti-CD 90             |                            |                                           |
| mouse anti-CD 105             |                            |                                           |
| anti-mouse Alexa Fluor 488    | Abcam<br>Cambridge<br>(UK) | flurochrome conjugated secondary antibody |
| anti-rabbit Alexa Fluor 594   |                            |                                           |
| Antibodies – flow cytometry   | Manufacturer               | Characteristics                           |
| CD 56 (FITC)                  | BD Pharmingen<br>(USA)     | Myogenic cell marker                      |
| CD 34 (FITC 581)              |                            | hematopoietic cell markers                |
| CD 45 (APC HI30)              |                            |                                           |
| CD 73 (APC AD2)               |                            | mesenchymal markers                       |
| CD 90 (FITC 5E10)             |                            |                                           |

*Abbreviations:* [99mTc]Tc-HMPAO - Technetium-99m Hexamethylpropyleneamine Oxime, SPECT/CT – single photon emission computed tomography/computed tomography.

### Supplementary Figure S2

Map of lentiviral vectors. a. MSCV-fluc-GFP-puromycin lentiviral reporter vector (produced by VectorBuilder): Firefly luciferase and GFP expression are controlled by an MSCV constitutive promoter. The puromycin resistance cassette allows for the selection of the transgenes. b. EF1-mkate-nanoluc-PGK-puromycin lentiviral reporter vector (produced by VectorBuilder): expression of fluorescent mkate and bioluminescent nanoluc is controlled by constitutive elongation factor 1 (EF1) promoter, and the second constitutive phosphoglycerate kinase-1 (PGK) promoter allows the selection of transduced cells.

*Abbreviations:* MSCV- murine stem cell virus, PGK- phosphoglycerate kinase, fluc- firefly luminescence, GFP- green fluorescent protein mkate- red fluorescence, nanoluc- nanoluciferase.

**A**

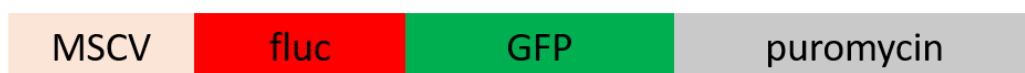

**B**

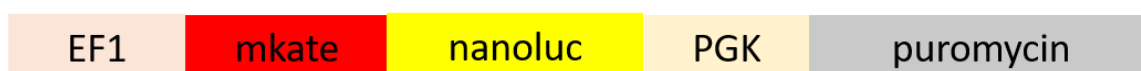

Supplement: s1 [file s1]
